# Supplementary material for: Structural insight into guanylyl cyclase receptor hijacking of the kinase–Hsp90 regulatory mechanism
Source: eLife. 2023 Aug 3;12:RP86784. doi: 10.7554/eLife.86784 (PMC10400071; doi:10.7554/eLife.86784)
Supplement: Supplementary file 1. [file elife-86784-supp1.docx]

**Structural insight into guanylyl cyclase receptor hijacking of the kinase–Hsp90 regulatory mechanism**

Nathanael A Caveney1,*, Naotaka Tsutsumi1,2,3, K Christopher Garcia1,2,*

1Departments of Molecular and Cellular Physiology and Structural Biology, Stanford University School of Medicine, Stanford, CA 94305, USA

2Howard Hughes Medical Institute, Stanford University School of Medicine, Stanford, CA 94305, USA

3Present address: Graduate School of Medicine, Dentistry and Pharmaceutical Sciences, Okayama University, Okayama, Japan.

*Correspondence: ncaveney@stanford.edu, kcgarcia@stanford.edu

Material availability: The plasmids used in this study are described below and available from KCG (kcgarcia@stanford.edu) by request.

| **Reagent type (species) or resource** | **Designation** | **Source or reference** | **Identifiers** | **Additional information** |
| --- | --- | --- | --- | --- |
| Recombinant DNA reagent | pD649-GCN4-TM-GC-C_ICD (plasmid) | This paper |  | See: Methods - Cloning and protein expression |

>pD649-GCN4-TM-GC-C_ICD

ATGAAGACTATAATCGCCCTCTCCTACATATTTTGCTTGGTGTTTGCCGACTACAAGGACGACGATGATAAAGGGTCTCTGGAAGTCCTTTTCCAGGGGCCCGGTAGAATGAAGCAACTCGAAGACAAAGTCGAGGAGCTTCTCTCTAAAAACTATCATCTCGAGAATGAAGTGGCCCGCCTGAAAAAACTCGTTGGCGAACGGAAGTTGCCAAATGATATAACCGGACGCGGACCACAAATTCTTATGATAGCTGTCTTTACACTTACAGGGGCTGTGGTGCTCCTGCTGTTGGTAGCGCTCCTCATGCTTCGAAAATACAGAAAGGATTATGAGCTCCGGCAGAAGAAATGGAGTCACATTCCTCCGGAAAACATTTTTCCTCTCGAGACAAACGAGACGAACCACGTATCCCTGAAAATCGACGACGACAAAAGACGAGATACCATCCAGCGATTGCGCCAGTGTAAATACGATAAGAAAAGAGTAATCCTCAAAGATTTGAAGCATAACGATGGCAATTTCACCGAGAAACAGAAGATTGAGCTGAATAAACTCTTGCAAATTGACTATTATAATTTGACCAAGTTTTACGGGACGGTCAAGTTGGACACGATGATATTTGGGGTGATAGAATATTGTGAACGCGGTAGTCTCAGAGAAGTCCTGAATGACACGATATCCTATCCCGATGGCACCTTTATGGACTGGGAATTCAAGATTAGCGTACTGTACGATATCGCCAAAGGAATGTCATATCTCCATAGTAGCAAAACCGAGGTTCACGGTCGCTTGAAATCAACCAATTGTGTCGTAGATAGTCGCATGGTCGTGAAGATTACTGATTTTGGATGTAATTCCATATTGCCGCCCAAAAAAGACTTGTGGACCGCTCCAGAACACCTTAGGCAGGCCAACATAAGTCAAAAGGGGGACGTTTACTCCTATGGTATTATAGCACAAGAAATTATCCTCCGAAAGGAAACATTTTATACCTTGTCTTGTCGAGACAGGAACGAAAAAATTTTTCGGGTGGAGAATTCCAATGGGATGAAACCATTTAGACCCGACCTCTTTCTGGAGACAGCTGAGGAGAAAGAGCTTGAAGTTTATTTGCTGGTGAAAAACTGTTGGGAAGAGGATCCGGAAAAACGGCCCGACTTTAAGAAGATTGAGACAACCTTGGCAAAAATATTCGGGTTGTTCCATGACCAGAAGAATGAAAGCTACATGGACACATTGATTAGGAGGTTGCAACTGTACTCACGGAACCTGGAGCACCTTGTCGAGGAGAGAACGCAGTTGTATAAGGCAGAAAGGGACCGAGCAGACAGACTGAATTTTATGCTCCTCCCCAGACTGGTTGTAAAAAGCCTGAAAGAAAAAGGCTTCGTGGAGCCTGAGCTGTATGAGGAAGTGACAATATACTTCTCCGACATAGTTGGTTTCACCACTATATGCAAATATTCTACACCCATGGAGGTCGTTGATATGCTCAACGATATATACAAGTCCTTTGACCATATCGTCGATCACCATGACGTATACAAAGTGGAGACCATCGGTGACGCATACATGGTGGCGAGCGGCCTGCCTAAAAGAAACGGTAACCGACATGCGATAGACATTGCTAAAATGGCTCTGGAGATCCTTAGTTTCATGGGCACGTTCGAACTGGAGCATCTCCCAGGCCTGCCTATCTGGATTCGAATAGGTGTGCATTCCGGGCCTTGCGCGGCCGGAGTGGTTGGTATCAAGATGCCGAGATACTGTCTCTTTGGAGACACAGTTAACACCGCCTCACGCATGGAGTCTACCGGGTTGCCGCTCCGCATTCATGTAAGTGGGTCTACGATAGCGATCTTGAAACGGACAGAGTGCCAATTTCTTTACGAAGTACGCGGAGAAACATATCTCAAGGGTCGGGGTAATGAGACCACTTATTGGCTCACGGGGATGAAGGATCAGAAGTTCAATCTGCCCACTCCCCCGACCGTTGAGAACCAGCAGAGACTGCAAGCGGAATTTTCAGATATGATCGCGAACTCTCTGCAGAAGCGGCAAGCGGCTGGGATTCGCTCCCAAAAGCCTAGACGCGTTGCGTCCTATAAGAAGGGTACCTTGGAGTACTTGCAGCTGAATACAACGGACAAAGAATCAACATATTTCGCGGCAGCGCTCGAGGTACTTTTCCAAGGCCCAGGAGCTGCTGAGGATCAGGTCGATCCTCGCCTTATCGACGGCAAACACCATCATCACCATCACCACCACtaaGGATCCGTTACCCGGTAAGCCAATCGGGTATACACGGTCGTCATACTGCAGACAGGGTTCTTCTACTTTGCAAGATAGTCTTGAGTAGTAAAATAAATAGATAGAGAAAATCAGCCTCGACTGTGCCTTCTAGTTGCCAGCCATCTGTTGTTTGCCCCTCCCCCGTGCCTTCCTTGACCCTGGAAGGTGCCACTCCCACTGTCCTTTCCTAATAAAATGAGGAAATTGCATCACAACACTCAACCCTATCTCGGTCTATTCTTTTGATTTATAAGGGATTTTGCCGATTTCGGCCTATTGGTTAAAAAATGAGCTGATTTAACAAAAATTTAACGCGAATTAATTCTGTGGAATGTGTGTCAGTTAGGGTGTGGAAAGTCCCCAGGCTCCCCAGCAGGCAGAAGTATGCAAAGCATGCATCTCAATTAGTCAGCAACCAGGTGTGGAAAGTCCCCAGGCTCCCCAGCAGGCAGAAGTATGCAAAGCATGCATCTCAATTAGTCAGCAACCATAGTCCCGCCCCTAACTCCGCCCATCCCGCCCCTAACTCCGCCCAGTTCCGCCCATTCTCCGCCCCATGGCTGACTAATTTTTTTTATTTATGCAGAGGCCGAGGCCGCCTCTGCCTCTGAGCTATTCCAGAAGTAGTGAGGAGGCTTTTTTGGAGGCCTAGGCTTTTGCAAAAAGCTCCCGGGAGCTTGTATATCCATTTTCGGATCTGATCAGCACGTGTTGACAATTAATCATCGGCATAGTATATCGGCATAGTATAATACGACAAGGTGAGGAACTAAACCATGACCGAGTACAAGCCCACGGTGCGCCTCGCCACCCGCGACGACGTCCCCAGGGCCGTACGCACCCTCGCCGCCGCGTTCGCCGACTACCCCGCCACGCGCCACACCGTCGATCCGGACCGCCACATCGAGCGGGTCACCGAGCTGCAAGAACTCTTCCTCACGCGCGTCGGGCTCGACATCGGCAAGGTGTGGGTCGCGGACGACGGCGCCGCGGTGGCGGTCTGGACCACGCCGGAGAGCGTCGAAGCGGGGGCGGTGTTCGCCGAGATCGGCCCGCGCATGGCCGAGTTGAGCGGTTCCCGGCTGGCCGCGCAGCAACAGATGGAAGGCCTCCTGGCGCCGCACCGGCCCAAGGAGCCCGCGTGGTTCCTGGCCACCGTCGGCGTCTCGCCCGACCACCAGGGCAAGGGTCTGGGCAGCGCCGTCGTGCTCCCCGGAGTGGAGGCGGCCGAGCGCGCCGGGGTGCCCGCCTTCCTGGAGACATCCGCGCCCCGCAACCTCCCCTTCTACGAGCGGCTCGGCTTCACCGTCACCGCCGACGTCGAGGTGCCCGAAGGACCGCGCACCTGGTGCATGACCCGCAAGCCCGGTGCCTGACACGTGCTACGAGATTTCGATTCCACCGCCGCCTTCTATGAAAGGTTGGGCTTCGGAATCGTTTTCCGGGACGCCGGCTGGATGATCCTCCAGCGCGGGGATCTCATGCTGGAGTTCTTCGCCCACCCCAACTTGTTTATTGCAGCTTATAATGGTTACAAATAAAGCAATAGCATCACAAATTTCACAAATAAAGCATTTTTTTCACTGCATTCTAGTTGTGGTTTGTCCAAACTCATCAATGTATCTTATCATGTCTGTATACCGTCGACCTCTAGCTAGAGCTTGGCGTAATCATGGTCATTACCAATGCTTAATCAGTGAGGCACCTATCTCAGCGATCTGTCTATTTCGTTCATCCATAGTTGCCTGACTCCCCGTCGTGTAGATAACTACGATACGGGAGGGCTTACCATCTGGCCCCAGCGCTGCGATGATACCGCGAGAACCACGCTCACCGGCTCCGGATTTATCAGCAATAAACCAGCCAGCCGGAAGGGCCGAGCGCAGAAGTGGTCCTGCAACTTTATCCGCCTCCATCCAGTCTATTAATTGTTGCCGGGAAGCTAGAGTAAGTAGTTCGCCAGTTAATAGTTTGCGCAACGTTGTTGCCATCGCTACAGGCATCGTGGTGTCACGCTCGTCGTTTGGTATGGCTTCATTCAGCTCCGGTTCCCAACGATCAAGGCGAGTTACATGATCCCCCATGTTGTGCAAAAAAGCGGTTAGCTCCTTCGGTCCTCCGATCGTTGTCAGAAGTAAGTTGGCCGCAGTGTTATCACTCATGGTTATGGCAGCACTGCATAATTCTCTTACTGTCATGCCATCCGTAAGATGCTTTTCTGTGACTGGTGAGTACTCAACCAAGTCATTCTGAGAATAGTGTATGCGGCGACCGAGTTGCTCTTGCCCGGCGTCAATACGGGATAATACCGCGCCACATAGCAGAACTTTAAAAGTGCTCATCATTGGAAAACGTTCTTCGGGGCGAAAACTCTCAAGGATCTTACCGCTGTTGAGATCCAGTTCGATGTAACCCACTCGTGCACCCAACTGATCTTCAGCATCTTTTACTTTCACCAGCGTTTCTGGGTGAGCAAAAACAGGAAGGCAAAATGCCGCAAAAAAGGGAATAAGGGCGACACGGAAATGTTGAATACTCATATTCTTCCTTTTTCAATATTATTGAAGCATTTATCAGGGTTATTGTCTCATGAGCGGATACATATTTGAATGTATTTAGAAAAATAAACAAATAGGGGTCAGTGTTACAACCAATTAACCAATTCTGAACATTATCGCGAGCCCATTTATACCTGAATATGGCTCATAACACCCCTTGCTCATGACCAAAATCCCTTAACGTGAGTTACGCGCGCGTCGTTCCACTGAGCGTCAGACCCCGTAGAAAAGATCAAAGGATCTTCTTGAGATCCTTTTTTTCTGCGCGTAATCTGCTGCTTGCAAACAAAAAAACCACCGCTACCAGCGGTGGTTTGTTTGCCGGATCAAGAGCTACCAACTCTTTTTCCGAAGGTAACTGGCTTCAGCAGAGCGCAGATACCAAATACTGTTCTTCTAGTGTAGCCGTAGTTAGCCCACCACTTCAAGAACTCTGTAGCACCGCCTACATACCTCGCTCTGCTAATCCTGTTACCAGTGGCTGCTGCCAGTGGCGATAAGTCGTGTCTTACCGGGTTGGACTCAAGACGATAGTTACCGGATAAGGCGCAGCGGTCGGGCTGAACGGGGGGTTCGTGCACACAGCCCAGCTTGGAGCGAACGACCTACACCGAACTGAGATACCTACAGCGTGAGCTATGAGAAAGCGCCACGCTTCCCGAAGGGAGAAAGGCGGACAGGTATCCGGTAAGCGGCAGGGTCGGAACAGGAGAGCGCACGAGGGAGCTTCCAGGGGGAAACGCCTGGTATCTTTATAGTCCTGTCGGGTTTCGCCACCTCTGACTTGAGCGTCGATTTTTGTGATGCTCGTCAGGGGGGCGGAGCCTATGGAAAAACGCCAGCAACGCGGCCTTTTTACGGTTCCTGGCCTTTTGCTGGCCTTTTGCTCACATGTTCTTTCCTGCGTTATCCCCTGATTCTGTGGATAACCGTATTACCGCCTTTGAGTGAGCTGATACCGCTCGCCGCAGCCGAACGACCGAGCGCAGCGAGTCAGTGAGCGAGGAAGCGGAAGGCGAGAGTAGGGAACTGCCAGGCATCAAACTAAGCAGAAGGCCCCTGACGGATGGCCTTTTTGCGTTTCTACAAACTCTTTCTGTGTTGTAAAACGACGGCCAGTCTTAAGCTCGGGCCCCCTGGGCGGTTCTGATAACGAGTAATCGTTAATCCGCAAATAACGTAAAAACCCGCTTCGGCGGGTTTTTTTATGGGGGGAGTTTAGGGAAAGAGCATTTGTCAGAATATTTAAGGGCGCCTGTCACTTTGCTTGATATATGAGAATTATTTAACCTTATAAATGAGAAAAAAGCAACGCACTTTAAATAAGATACGTTGCTTTTTCGATTGATGAACACCTATAATTAAACTATTCATCTATTATTTATGATTTTTTGTATATACAATATTTCTAGTTTGTTAAAGAGAATTAAGAAAATAAATCTCGAAAATAATAAAGGGAAAATCAGTTTTTGATATCAAAATTATACATGTCAACGATAATACAAAATATAATACAAACTATAAGATGTTATCAGTATTTATTATCATTTAGAATAAATTTTGTGTCGCCCTTAATTGTGAGCGGATAACAATTACGAGCTTCATGCACAGTGGCGTTGACTCAATATTGGCCATTAGCCATATTATTCATTGGTTATATAGCATAAATCAATATTGGCTATTGGCCATTGCATACGTTGTATCTATATCATAATATGTACATTTATATTGGCTCATGTCCAATATGACCGCCATGTTGGCATTGATTATTGACTAGTTATTAATAGTAATCAATTACGGGGTCATTAGTTCATAGCCCATATATGGAGTTCCGCGTTACATAACTTACGGTAAATGGCCCGCCTGGCTGACCGCCCAACGACCCCCGCCCATTGACGTCAATAATGACGTATGTTCCCATAGTAACGCCAATAGGGACTTTCCATTGACGTCAATGGGTGGAGTATTTACGGTAAACTGCCCACTTGGCAGTACATCAAGTGTATCATATGCCAAGTACGCCCCCTATTGACGTCAATGACGGTAAATGGCCCGCCTGGCATTATGCCCAGTACATGACCTTATGGGACTTTCCTACTTGGCAGTACATCTACGTATTAGTCATCGCTATTACCATGGTGATGCGGTTTTGGCAGTACATCAATGGGCGTGGATAGCGGTTTGACTCACGGGGATTTCCAAGTCTCCACCCCATTGACGTCAATGGGAGTTTGTTTTGGCACCAAAATCAACGGGACTTTCCAAAATGTCGTAACAACTCCGCCCCATTGACGCAAATGGGCGGTAGGCGTGTACGGTGGGAGGTCTATATAAGCAGAGCTCGTTTAGTGAACCGTCAGATCGCCTGGAGACGCCATCCACGCTGTTTTGACCTCCATAGAAGACACCGGGACCGATCCAGCCTCCGCGGCCGGGAACGGTGCATTGGAACGCGGATTCCCCGTGCCAAGAGTGACGTAAGTACCGCCTATAGAGTCTATAGGCCCACCCCCTTGGCTTCGTTAGAACGCGGCTACAATTAATACATAACCTTATGTATCATACACATACGATTTAGGTGACACTATAGAATAACATCCACTTTGCCTTTCTCTCCACAGGTGTCCACTCCCAGGTCCAACTGCACCTCGGTTCTATCGAAAACGCGCCTGCTAGCGCCACC
